# Supplementary material
Source: PubMed Central journal article supplement (PMC1383717)
Supplement: bj3940675add.pdf [file bj3940675add.pdf]

## SUPPLEMENTARY FIGURES LEGEND

Suppl. Fig. 1. Phylogenetic analysis of the  $(\alpha/\beta)_8$ -barrel sequences of GH2 family members. The name of the originating organism and the database entry are indicated. Cs: CsxA and related ORFs. CsS: *Streptomyces avermitilis* (NP\_822398); CsAo: *Amycolatopsis orientalis* (this work; CsxA, AAX62629); CsN: *Neurospora crassa* (XP\_331434.1); CsM: *Magnaporthe grisea* (MG05864.4); CsG: *Gibberella zeae* (FG02314.1); CsH: *Hypocrea jecorina* (BAD99604); CsAn: *Aspergillus nidulans* (AN2824.2); Ga:  $\beta$ -galactosidases from: GaK: *Kluyveromyces lactis* (P00723; BGAL\_KLULA); GaL: *Lactococcus lactis* (Q48727; BGAL\_LACLA); GaEcl: *Enterobacter cloacae* (Q47077, BGAL\_ENTCL); GaEco: *Escherichia coli* (P00722, BGAL\_ECOLI); GaA: *Arthrobacter* sp. (Q59140, GAL\_ARTSB); GaC: *Clostridium acetobutylicum* (P24131, BGAL\_CLOAB); Gl:  $\beta$ -glucuronidases from: GIC: *Canis familiaris* (O18835, BGLR\_CANFA); GIF: *Felis silvestris catus* (O97524, BGLR\_FELCA); GIM: *Mus musculus* (P12265, BGLR\_MOUSE); GIH: *Homo sapiens* (P08236, BGLR\_HUMAN); GIE: *Escherichia coli* (P05804, BGLR\_ECOLI); GIS: *Staphylococcus* sp. (patent PCT/US98/19217); GIL: *Lactobacillus gasserii* (AAK07836, Q9AHJ8\_9LACO); Ma:  $\beta$ -mannosidases from: MaA: *Aspergillus niger* (Q9UUZ3, MANBA\_ASPNG); MaB: *Bos taurus* (Q29444, MANBA\_BOVIN); MaH: *Homo sapiens* (O00462, MANBA\_HUMAN); MaM: *Mus musculus* (Q8K2I4\_MOUSE); MaT: *Thermobifida fusca* (CAD33708, Q8KLI9\_THEFU); MaC: *Cellulomonas fimi* (AAD42775, Q9XCV4\_CELFI); Un: proteins of unknown catalytic activity having a glutamate as a putative acid/base residue preceded by a serine: UnA: *Agrobacterium tumefaciens* (NP\_533240, ATU2575); UnBm: *Burkholderia mallei* (YP\_101889, BMA0039); UnBp: *Burkholderia pseudomallei* (YP\_107240, BPSL0611); UnBc: *Burkholderia* sp. 383 cepacia (YP\_372566\_ZP\_00215636); UnBv: *Burkholderia vietnamiensis* (ZP\_00425692); UnR: *Ralstonia eutropha* (ZP\_00166278).

Suppl. Fig. 2. Assignment of putative catalytic residues in GH2 family members through structure-guided alignment. Symbols as in Suppl. Fig. 1. Alignment was obtained by the 3DCoffee structure guided alignment method [20] using the domain 3 from human  $\beta$ -glucuronidase as template. Secondary structures are shaded in dark gray ( $\alpha$ -helices) or light gray ( $\beta$ -sheets). Secondary structures formally identified in crystallized proteins are shown for human  $\beta$ -glucuronidase (PDB ID: 1bhg:A) and *E.coli*  $\beta$ -galactosidase LacZ (PDB ID: 1DPO:A). These two proteins are indicated by bold symbols **GIH** and **GaEco**, respectively. Secondary structures in other proteins were predicted by the PSIPRED algorithm [21]. The putative catalytic acid/base and nucleophile residues are indicated with asterisks. Catalytic residues formally identified by mechanistic studies [35-39] are underlined. Other strictly conserved residues are indicated with triangles.

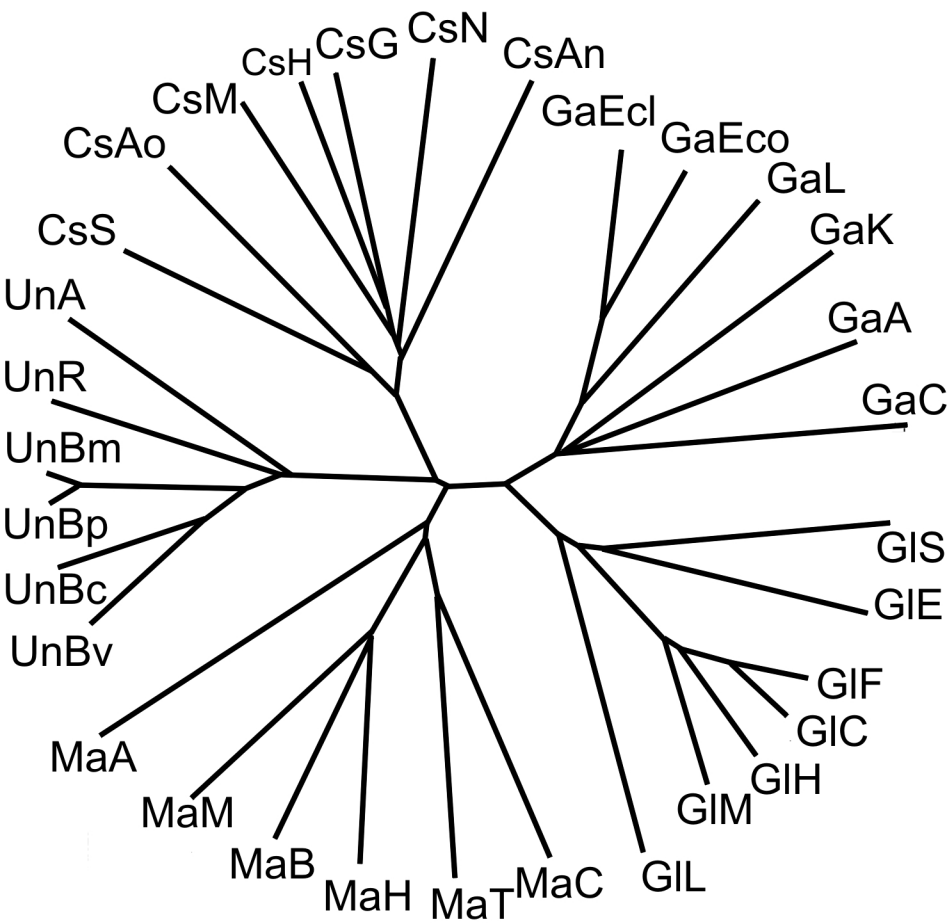

## Supplementary Figure 2

|              | 340             | 350          | 360                   | 370               | 380                      | 390                      | 400           |               |                |             |                |
|--------------|-----------------|--------------|-----------------------|-------------------|--------------------------|--------------------------|---------------|---------------|----------------|-------------|----------------|
| CsAo         | D--VKA--TLNSSGG | QYSVNGKPLLR  | IRGGYTPDLFL--RW-NE    | TAAADKLKYV        | LNGLNTVRLEGH--IE         | PDEFFDIA                 |               |               |                |             |                |
| CsS          | D--VKA--PLNSD   | GARQYSVNGRRL | LKGGWSPDEFL--RW-DS    | TYVEDRLRYALD      | LGLNTRIRLEGH--IE         | PDEFFDLA                 |               |               |                |             |                |
| CsH          | K--VTS--FVNQF   | NDTQYSVNGHP  | FQVIGGGYGADMFL--RW-DS | ERFTRIVEYMLDM     | HQNTIRLEGG--MEHPELYEIC   |                          |               |               |                |             |                |
| CsN          | T--VTS--QLNSF   | NDITFLINSHPF | QVLGAGYAPDMFL--RF-S   | PAKFESEARYVLD     | LGFNTRIRLEGG--NEHPELYQIA |                          |               |               |                |             |                |
| <b>GLH</b>   | VA-----         | VTKSQFLINGK  | PFYFHGVNKHEDADIR      | KGKGFDP           | WPLLKDFNLLR              | WLGANAFRTSHY--PYAEEVMQMC |               |               |                |             |                |
| G1M          | VA-----         | VTKSKFLINGK  | PFYFQGVNKHEDSIR       | KGKGFDP           | WPLLKDFNLLR              | WLGANSFRTSHY--PYSEEVLQLC |               |               |                |             |                |
| G1E          | VA-----         | VKGEQFLINHK  | PFYFTGFRHEDADLR       | KGKGFDP           | NVLMVHDHALMD             | WIGANSYRTSHY--PYAEMLDWA  |               |               |                |             |                |
| G1L          | VK-----         | IVNDKILLN    | NHPIYLKGF             | GKHEDFNVLGKAVNESI | IKRDYECMKWIGANC          | FRSSHY--PYAEEWYQYA       |               |               |                |             |                |
| GaC          | FE-----         | MKDKIMCLK    | WKRIIFKGVNRHEFS       | ARRGRSIT          | KEDMLWDIKFLKQHN          | INAVRTSHY--PNOSLWYRLC    |               |               |                |             |                |
| GaA          | VK-----         | IVGDQFLV     | NGRKFVIFHGVNRHET      | NADRGRV           | FEASAREDLALMKR           | FNVAIRTSHY--PHHPRFLDLA   |               |               |                |             |                |
| GaEc1        | VE-----         | ISNGLLKL     | NGKPLLRGVNRHEH        | SENGQVMD          | EATMRRDIETMKQ            | HSFNAVRTSHY--PYAEMLDWA   |               |               |                |             |                |
| <b>GaEco</b> | VR-----         | IENGLLLL     | NGKPLLRGVNRHEH        | PHLHGQVMD         | EQTMVQDILLMKQ            | NNFNVAVRTSHY--PNHPLWYTL  |               |               |                |             |                |
| MaB          | VELVEEPI        | QNSPGLSFYFK  | INGLPIFLKGSNWIP       | ADSFQDRV-T        | SAMRLLQLQSVVD            | ANMNLRVWGGGYE            | QDEFYELC      |               |                |             |                |
| MaH          | VELIEEPI        | KGSPGLSFYFK  | INGLPIFLKGSNWIP       | ADSFQDRV-T        | SELLRLLQLQSVVD           | ANMNLTRVWGGGYE           | QDEFYELC      |               |                |             |                |
| MaM          | VQLIEEPI        | KGSPGLSFYFK  | INGLPIFLKGSNWIP       | ADSFQDRV-T        | SRLQLLQSVVD              | ANMNLTRVWGGGYE           | QDEFYALC      |               |                |             |                |
| MaC          | VEVD--          | TPDE         | DGTPFTRVNGRPV         | FVKGANWIP         | DDHLLTRI-T               | RERLAHRLDQAVE            | ANLNLRVWGGGYE | SEDFYDLC      |                |             |                |
| UnA          | -----           | GNGFGLK      | VNGQPVFCRGAV          | TTAIVRLPG-T       | RPDYE                    | PWLKKAEEAGNM             | MIRVGGTMA     | YETPEFFALC    |                |             |                |
| UnBc         | -----           | GKGFGLR      | INGVVPV               | FARGACWSSA        | APALHA-D                 | DATYARLLGL               | LARDAGFN      | MIRVGGTMTY    | EADAFHAWC      |             |                |
| UnBv         | -----           | GNGFGLR      | VNGTPV                | FARGACWSSA        | APALHA-D                 | DATYARLLGL               | LARDAGFN      | MIRVGGTMTY    | EADAFHAWC      |             |                |
| UnBm         | -----           | GRGFALS      | VNGTPLF               | FARGACWTS         | ADPVLGHA-D               | APAYRRAL                 | LVLARDAGC     | NMIRVGGTMI    | YADAFYALC      |             |                |
|              |                 | ::           | ▲                     |                   |                          | ▲                        | ▲             |               |                |             |                |
|              | 410             | 420          | 430                   | 440               | 450                      | 460                      | 470           |               |                |             |                |
| CsAo         | DDLGLV          | LTMPGW       | ECCDKWEGQ---          | VNGEEK-G---       | EPWVES                   | DYPIAKASMF               | SEAERLRD      | HPSVISFHIGSDF | FAPDRRIE       |             |                |
| CsS          | DRYGIL          | TLPGW        | CCNKWEGN---           | VNGSGS-G---       | DEWTA                    | ADYPVAKAS                | MAAEEARLRD    | HPSVVSFLIGSDF | FAPDAKIE       |             |                |
| CsH          | DEYGLM          | VMPGW        | ECCDKWEAW---          | AYNDEL-A          | I                        | FPFVW                    | ANDYETANY     | SMIHEAAMQ     | PHPSVLTFLVGSDF | FWNDEAV     |                |
| CsN          | DRLGIM          | L            | AGWECCDKWEAW---       | SYNQDL-TV         | PTPV                     | WSEDDY                   | NIANASMF      | HEAGMLQ       | THPSILGYLIGSDY | WDP         |                |
| <b>GLH</b>   | DRYGI           | VVIDE        | CPGVGLALPQFFN---      | -----             | -----                    | NVSLHHHMQ                | MEVVRRD       | KNHPAVVM      | SVANEP         | PASHLESA    |                |
| G1M          | DRYGI           | VVIDE        | CPGVGLVLPQSF          | -----             | -----                    | NESLRHHLE                | VMEELVRRD     | KNHPAVVM      | SVANEP         | PSSALKPA    |                |
| G1E          | DEHGI           | VVIDE        | TA                    | AVGFNLSL          | GIGFEAGN                 | PKELYSEEAVN              | GETQQAHL      | QAIKELI       | ARDKNHPSV      | VMWSIANEP   | DPTRPQGA       |
| G1L          | DKYGF           | LIDEV        | PAVGLNRSIT            | NFLNVTNS          | NQSHFFASK                | TP                       | PELKKVHEQE    | IKEMIDRD      | QRHPSVIA       | WSLFNEPE    | STQES          |
| GaC          | DEYGI           | YLIDE        | TNLESHGS---           | WQKMGQIE          | PSWNV                    | PGSLP                    | QWQAAVLD      | RASSM         | VERDKNHPSV     | LWSCGNE     | SYAGE          |
| GaA          | DELGF           | VVILE        | CDLETHGF---           | HALKWV---         | GNP                      | SDDPA                    | WRDALVDR      | MERTVERD      | KNHASI         | VMWSLGN     | ESGTGANLA      |
| GaEc1        | DRYGL           | VVDE         | ANIETHGM---           | VPM               | SRL---                   | ADD                      | PRWLPAM       | SERVTR        | RMVQRDRN       | HPSII       | IWSLGN         |
| <b>GaEco</b> | DRYGL           | VVDE         | ANIETHGM---           | VPM               | NRL---                   | TDD                      | PRWLPAM       | SERVTR        | RMVQRDRN       | HPSVI       | IWSLGN         |
| MaB          | DELGI           | MVQD         | FMFAC---              | -----             | ALY                      | PTD-K                    | DFMDSV        | REEVTHQ       | VRRLLK         | SHPSII      | IWSGNN         |
| MaH          | DELGI           | MVQD         | FMFAC---              | -----             | ALY                      | PTD-Q                    | GFLDSV        | TAEVAYQ       | IKRLK          | SHPSII      | IWSGNN         |
| MaM          | DELGI           | MVQD         | FMFAS---              | -----             | ALY                      | PTD-P                    | GFLASV        | RKEVTV        | QVRRLLK        | SHPSII      | IWSGNN         |
| MaC          | DERGL           | LVVQD        | FLLAC---              | -----             | AAY                      | PEE-Q                    | IWDELE        | AEAREN        | VARLTP         | HASLV       | WNGGN          |
| UnA          | DELGI           | MVQD         | DAMLAN---             | -----             | FDY                      | PAKDD                    | GLRQHI        | VMEIE         | QLLE           | STALSP      | SFAIF          |
| UnBc         | DRLGL           | LVVQD        | FMFAN---              | -----             | FDY                      | ALDD                     | PAFADN        | VREARQ        | FLSRHS         | SASPS       | SLAVLC         |
| UnBv         | DRLGL           | LVVQD        | FMFAN---              | -----             | FDY                      | ALDD                     | RAFADA        | VDAEAD        | QFLARR         | RASPS       | SLAVLC         |
| UnBm         | DELGL           | LVVQD        | FMLAN---              | -----             | FDY                      | PSND                     | PRFAES        | LKREAE        | QFLGRH         | MARPSI      | AVLC           |
|              | ▲               | ▲            |                       |                   |                          |                          |               |               |                |             | * :            |
|              | 480             | 490          | 500                   | 510               |                          |                          |               |               |                |             |                |
| CsAo         | QGYLD           | -----        | AMKAA                 | DFLLP             | VPIPAAS-AR               | PSP-ITG                  | ASGMK-----    |               |                |             |                |
| CsS          | KTYLD           | -----        | ALKAA                 | DWPTP             | VVAAS-DK                 | SSP-VSG                  | SSGMK-----    |               |                |             |                |
| CsH          | VLYAN           | -----        | ALKN                  | AGWQ              | TFIIASAS-K               | RGF                      | PALLG         | PGGMK-----    |                |             |                |
| CsN          | PMYIN           | -----        | TLRL                  | QDWQ              | TPVLS                    | SSAS-K                   | RGF           | PSMG          | SPGLK-----     |             |                |
| <b>GLH</b>   | GYI             | -----        | LKM                   | VI                | AHTKSLDP-SR              | PVTV                     | FVSN          | SNYAA--DK     | GAPYVD         | VICL        | NSYYSWY        |
| G1M          | AYY             | -----        | FKTL                  | I                 | THTKALDL-TR              | PVTV                     | FVSN          | AKYDA--DL     | GAPYVD         | VICV        | NSYYSWY        |
| G1E          | REY             | -----        | FAP                   | LAE               | ATRKLDP-TR               | PIT                      | CVN           | MFCDAHTDTIS   | DLFDV          | LCLN        | RYYGWY         |
| G1L          | YDY             | -----        | FKDI                  | F                 | AFARKLDP                 | QNR                      | PYTGT         | LV            | MGSG           | PKVD        | KLHPL          |
| GaC          | Q               | -----        | MSKY                  | FR                | KKDP-SR                  | L                        | VH            | YEGV          | TRC-----       | REFM-----   | TR-RHESRM      |
| GaA          | A               | -----        | MAA                   | W                 | THARDL-SR                | PV                       | H             | YEGDY         | TG-A-----      | YTDVYS----- | RMYSSTP-ETDSIG |
| GaEc1        | A               | -----        | LYR                   | W                 | LKTDP-TR                 | PV                       | Q             | YEGG          | ANTAA-----     | TDIVC-----  | PMYARVD-RDQPPF |
| <b>GaEco</b> | A               | -----        | LYR                   | W                 | I                        | K                        | S             | VDP-SR        | PV             | Q           | YEGG           |
| MaB          | WYD             | TK           | PGYLQ                 | TYIK              | DYV                      | TL                       | V             | VKNIR         | TIVLE          | G           | DQ-TR          |
| MaH          | WYH             | S            | TDR                   | PIYIK             | DYV                      | TL                       | V             | VKNIR         | ELV            | L           | AGDK-SR        |
| MaM          | WFH             | V            | NR                    | DM                | KTYID                    | DYV                      | TL            | V             | VKNIR          | KIV         | LSEDK-SR       |
| MaC          | WG              | P            | Q                     | E                 | L                        | E                        | G             | R             | T              | W           | G              |
| UnA          | GL              | P            | E                     | Q                 | -----                    | I                        | W             | K             | -----          | T           | L              |
| UnBc         | GL              | G            | P                     | K                 | -----                    | Q                        | R             | F             | -----          | E           | L              |
| UnBv         | GL              | G            | P                     | K                 | -----                    | Q                        | R             | A             | -----          | E           | L              |
| UnBm         | GL              | A            | P                     | D                 | -----                    | E                        | R             | R             | -----          | P           | A              |

|              | 520                                                                                                        | 530 | 540 | 550 | 560 | 570 | 580 |
|--------------|------------------------------------------------------------------------------------------------------------|-----|-----|-----|-----|-----|-----|
| CsAo         | NGPYDYV---PPVYWDK---SQKDRGGAW---SFNSETSAGVDIPTMDTLKR-MMSASELDTMWKNPSAKQYHRSSS                              |     |     |     |     |     |     |
| CsS          | TGPYDWI---PPNYWYA---KREGGAT---GFNSETSAGVDIPTLDTLRR-MMTPAELDTLWKNPGAKQYHRSPS                                |     |     |     |     |     |     |
| CsH          | DGPYDWW---PPNYWYDV---EPS <del>ED</del> RLGAAF---GFGSELGAGVGTPELSSLR-FLNQSDLDDLWKNPNKNL <del>FHM</del> ST-  |     |     |     |     |     |     |
| CsN          | EGPYDWW---PPNYWYDT---EPSAGRFGAAF---GFGSELGAGVGTPELSSLR-FLSPDLTDLWKNPNKDLF <del>HMS</del> ST                |     |     |     |     |     |     |
| <b>GlH</b>   | LQLATQF---ENWYK---KY-----QKPIIQSE-YGAETIAGFHQDPPL-----                                                     |     |     |     |     |     |     |
| GlM          | PQLNSQF---ENWYK---TH-----QKPIIQSE-YGADAI PGIHEDPPR-----                                                    |     |     |     |     |     |     |
| GlE          | KVLEKEL---LAWQE---KL-----HQPIITE-YGVDTLAGLHSMYTD-----                                                      |     |     |     |     |     |     |
| GlL          | KMLEDEL---DGWQNL-KL-----NKPFVFE-FGADTLSSSHRLPDE-----                                                       |     |     |     |     |     |     |
| GaC          | YAKAAEI---EEYLN-DNP-----KKPYSCE-YMHSM-----GNS-----                                                         |     |     |     |     |     |     |
| GaA          | RNDSHALLGCNAIESARQR-----TRPFILCE-YVHAM-----GNG-----                                                        |     |     |     |     |     |     |
| GaEcl        | AVPKWSI---KKWIGMPDE-----TRPLILCE-YAHAM-----GNS-----                                                        |     |     |     |     |     |     |
| <b>GaEco</b> | AVPKWSI---KKWLSLPGE-----TRPLILCE-YAHAM-----GNS-----                                                        |     |     |     |     |     |     |
| MaB          | YDLNYGD---VHFYDY---VSDCWNWRTFPKARFVSE-YGYQSWPSFSTLEK-VSSEEDWSYRSS---FALHRQHL                               |     |     |     |     |     |     |
| MaH          | NSNYFGD---VHFYDY---ISDCWNWVFPKARFVSE-YGYQSWPSFSTLEK-VSSTEDWSFNK---FSLHRQHH                                 |     |     |     |     |     |     |
| MaM          | YSIQYGD---IHFYNY---ADDCWNWVFPKARFVSE-YGYQSWPSFSTLEK-VSSQEDWAYNSR---FSLHRQHH                                |     |     |     |     |     |     |
| MaC          | NDPDHGT---HHEWEV---WNRVDYSA <del>Y</del> RDDV---PRFCE-FGFQGPPTWSTLTR-AVRADDGGPLTKDDPT <del>FLLH</del> -QKA |     |     |     |     |     |     |
| UnA          | FFPNAGV---GHYYGVGAYCRPLEDARRADL---RFAAECLAFANIPEQETLDRYLPGVAVHDP <del>RWK</del> ---ARTPRDRG                |     |     |     |     |     |     |
| UnBc         | FAPRERV---SHYYGVGAYLRPLDDARRADV---RFASECLAFSNVPCDATLAE-LGWPGVHEPRWK---AAVPRDPG                             |     |     |     |     |     |     |
| UnBv         | FVPRERV---SHYYGVGAYLRPLDDARRADV---RFASECLAFANVPCDATLER-IGRPHPEPRWK---AAVPRDPG                              |     |     |     |     |     |     |
| UnBm         | FAPREGV---THYYGVGAYLRPLEDARRAGV---RFASECLAFANVPCDATLAS-IGSPAAHEPAWK---RAVPRDPG                             |     |     |     |     |     |     |

\*

|              | 590                                                                                                                                                                                                                                                                                            | 600 | 610 | 620 | 630 | 640 |
|--------------|------------------------------------------------------------------------------------------------------------------------------------------------------------------------------------------------------------------------------------------------------------------------------------------------|-----|-----|-----|-----|-----|
| CsAo         | --DTFGLKLFGDALTKRYGASAN---LNDFVR-KAQLSQYENVRAEFESHRYTD-----STNPSTGLIYWMLNSP                                                                                                                                                                                                                    |     |     |     |     |     |
| CsS          | --SVFGLTKIYDAALAGRYGAPTG---LTDYVR-KAQLAQYENVRAQFEAYGRGATD-----ASKPATGVIYWMFNNG                                                                                                                                                                                                                 |     |     |     |     |     |
| CsH          | NASSFYNRKIYNQGLWKRYGAPTS---LDDYLL-KAQMDYEA <del>TR</del> AQYEGFGALWT---ASRPATGVIYWMNLNA                                                                                                                                                                                                        |     |     |     |     |     |
| CsN          | ETSSFRNRRIYNTGLWNRWSAPTS---LEDYVQ-KSQITDYEA <del>TR</del> AQFEGYAANWGN-----SORPATGMIYWMLNGA                                                                                                                                                                                                    |     |     |     |     |     |
| <b>GlH</b>   | -----MFT <del>EEY</del> QKSLLEQY---HLGLDQKRRKYVVGELIWNFADF                                                                                                                                                                                                                                     |     |     |     |     |     |
| GlM          | -----MF <del>SEY</del> QKAVLENY---HSVLDQKRRKEYVVGELIWNFADF                                                                                                                                                                                                                                     |     |     |     |     |     |
| GlE          | -----MW <del>SEY</del> QCAWLDMY---HRVFD--RVSAVVGEGV <del>QV</del> WNFADF                                                                                                                                                                                                                       |     |     |     |     |     |
| GlL          | -----MWS <del>Q</del> EYQNEY <del>Y</del> QMY---FDIFK--KYPFICGELVWNFADF                                                                                                                                                                                                                        |     |     |     |     |     |
| GaC          | -----TGG-----MMKY---TELED--KYL <del>MY</del> QGG <del>F</del> IWDYGDQ                                                                                                                                                                                                                          |     |     |     |     |     |
| GaA          | -----PGA---IDQY---EDLVD--KYPRLHGGFVWEWRDH                                                                                                                                                                                                                                                      |     |     |     |     |     |
| GaEcl        | -----FGG---FAKY---WQAFR--SHPR <del>L</del> QGGFVWDVVDQ                                                                                                                                                                                                                                         |     |     |     |     |     |
| <b>GaEco</b> | -----LGG---FAKY---WQAFR--QYPR <del>L</del> QGGFVWDVVDQ                                                                                                                                                                                                                                         |     |     |     |     |     |
| MaB          | --INGNNEMLHQIELHFKLPNSTDQLRRFKDTLY--LTQVMQAQCVKTE <del>TE</del> EFYRRSRSEIVN--GKGHTMGALYWLQNDI                                                                                                                                                                                                 |     |     |     |     |     |
| MaH          | --EGGNKQMLYQAGLHFKLPQSTDP <del>LR</del> TFKDTIY--LTQVMQAQCVKTE <del>TE</del> EFYRRSRSEIVD--QQGHTMGALYWLQNDI                                                                                                                                                                                    |     |     |     |     |     |
| MaM          | --EDGNHQMLHQVKMHFKLPQGTDP <del>LR</del> TFKDTIY--LTQVMQAQC <del>IK</del> TE <del>TE</del> EFYRLSRSEIVD--GKGHTMGALYWLQNDI                                                                                                                                                                       |     |     |     |     |     |
| MaC          | --EDGNGLDRGLAPHLGV <del>P</del> AG---FVDWHW--ATQLNQARAVAF <del>AE</del> IHYRS-----WWPRTAGAI <del>V</del> WLQNDI                                                                                                                                                                                |     |     |     |     |     |
| UnA          | --ASWDFEDV <del>RD</del> HYL <del>K</del> LLYEAPDVLRRREDGALYL <del>DM</del> SRA <del>TA</del> EVM <del>EAT</del> FAEWRR-----SGSSCGALVW <del>Q</del> LDL                                                                                                                                        |     |     |     |     |     |
| UnBc         | --TSWDFED <del>IR</del> DHYL <del>Q</del> TLY <del>D</del> VV <del>P</del> DLR <del>LR</del> RED <del>PS</del> RY <del>F</del> EL <del>S</del> RS <del>VI</del> AD <del>LM</del> RET <del>F</del> SEWRR-----TGSR <del>C</del> AGALV <del>W</del> Q <del>F</del> QDV                            |     |     |     |     |     |
| UnBv         | --ASWDFED <del>D</del> VR <del>D</del> HYL <del>R</del> TLY <del>D</del> V <del>A</del> PER <del>L</del> R <del>R</del> RED <del>P</del> ARY <del>F</del> EL <del>S</del> RA <del>VI</del> AD <del>VM</del> RET <del>F</del> SEWRR-----TGSR <del>C</del> AGALV <del>W</del> Q <del>F</del> QDV |     |     |     |     |     |
| UnBm         | --APWDFED <del>D</del> VR <del>D</del> HYL <del>R</del> ALY <del>G</del> VE <del>P</del> AR <del>L</del> R <del>S</del> ID <del>P</del> ARY <del>L</del> T <del>L</del> SRA <del>V</del> AD <del>L</del> V <del>ET</del> LAEWRR-----VGSS <del>C</del> AGALV <del>W</del> Q <del>F</del> QDV    |     |     |     |     |     |

▲ ▲

|              | 650                                                                                                                                                             | 660 | 670 |
|--------------|-----------------------------------------------------------------------------------------------------------------------------------------------------------------|-----|-----|
| CsAo         | ----W <del>T</del> SLHW <del>Q</del> LFDAYMD-----QNGAYYGAKKAN <del>E</del> PLHI                                                                                 |     |     |
| CsS          | ----W <del>T</del> SLHW <del>Q</del> LLDRYLD-----QGGAYFGAKKAN <del>E</del> PLHV                                                                                 |     |     |
| CsH          | ----W <del>P</del> SLHW <del>N</del> QFDYYLH-----PAGSYFGTKVGSRIEHV                                                                                              |     |     |
| CsN          | ----F <del>P</del> SLHWSIWDYYMH-----PAGAYFGAKVGSRIEHV                                                                                                           |     |     |
| <b>GlH</b>   | ----MTEQSPTRVLGN-----KKGIFTRQRQPKSA <del>A</del> FL <del>L</del> RERY <del>W</del> KIAN                                                                         |     |     |
| GlM          | ----MTNQSPLRVIGN-----KKGIFTRQRQPKTSA <del>F</del> IL <del>L</del> RERY <del>W</del> RIAN                                                                        |     |     |
| GlE          | ----ATSQGI <del>L</del> RVGGN-----KKGIFTRDRKPKSA <del>A</del> FL <del>L</del> QKRW <del>T</del> GMN                                                             |     |     |
| GlL          | ----KTSEGI <del>M</del> RVGGN-----DKGIFTRDREPKDIA <del>F</del> T <del>L</del> KKR <del>W</del> QQLN                                                             |     |     |
| GaC          | ALYRKL <del>P</del> DGKEV <del>L</del> AYGGDF <del>T</del> DRPTD <del>Y</del> NFSGNGLI <del>Y</del> ADRTI <del>S</del> PKAQEV <del>K</del> LY <del>Q</del> NVKL |     |     |
| GaA          | GIRTRTADGTEFFAYGGDF <del>E</del> VIH <del>D</del> GNF <del>V</del> MDGMIL <del>S</del> DSTPT <del>F</del> GLFEY <del>K</del> QIV <del>S</del> PIRL              |     |     |
| GaEcl        | ALTKREDGNTFFWYGGDFGDKPNDRQ <del>F</del> CLNGLV <del>F</del> PDRT <del>P</del> HPAL <del>E</del> YAHG <del>P</del> Q <del>F</del> FFTF                           |     |     |
| <b>GaEco</b> | SLIKYDENG <del>N</del> PWSAYGGDFG <del>D</del> TPNDRQ <del>F</del> CMNGLV <del>F</del> ADRT <del>P</del> HPAL <del>E</del> AKH <del>Q</del> Q <del>F</del> FFQF |     |     |
| MaB          | ----WQAPSW <del>S</del> LE <del>Y</del> GGK-----WKMLHYFAR <del>H</del> FAPL--                                                                                   |     |     |
| MaH          | ----WQAPSW <del>A</del> SLE <del>Y</del> GGK-----WKMLHYFA <del>Q</del> NFFAPL--                                                                                 |     |     |
| MaM          | ----WQAPSW <del>A</del> SLE <del>Y</del> GGK-----WKMLHYFA <del>R</del> RFAPL--                                                                                  |     |     |
| MaC          | ----WPVTSWAAIDGDER-----VKPLW <del>H</del> ALRRAYAPR--                                                                                                           |     |     |
| UnA          | ----VPGAGWGI <del>I</del> DAAGR-----PKSV <del>W</del> HALKRAFR--                                                                                                |     |     |
| UnBc         | ----MPGAGW <del>G</del> MIDAHR-----PKSA <del>W</del> HALRQVLQ---                                                                                                |     |     |
| UnBv         | ----MPGAGW <del>L</del> LDAHL-----PKSG <del>W</del> YALRQVLQ---                                                                                                 |     |     |
| UnBm         | ----MPGAGW <del>G</del> LVDAGR-----PKSA <del>W</del> HALRRV-----                                                                                                |     |     |
